# Supplementary material for: A Spatial, Social and Environmental Study of Tuberculosis in China Using Statistical and GIS Technology
Source: PubMed Central journal article supplement (PMC4344675; doi:10.3390/ijerph120201425), 2015-01-27
Supplement: ijerph-12-01425-s001.pdf [file ijerph-12-01425-s001.pdf]

## A Spatial, Social and Environmental Study of Tuberculosis in China Using Statistical and GIS Technology

**Table S1.** Bootstrapping tests of outer loadings of observed variables from the PLS-PM.

| Observed Variable                  | Sample Mean | Standard Deviation | Standard Error | T Statistics |
|------------------------------------|-------------|--------------------|----------------|--------------|
| X1 <- Altitude factor              | -0.9863     | 0.0057             | 0.0057         | 172.9124 *   |
| X5 <- Altitude factor              | 0.9885      | 0.0044             | 0.0044         | 222.7768 *   |
| X2 <- Longitude factor             | 1           | -                  | -              | -            |
| X4 <- Climatic factor              | 0.8817      | 0.1531             | 0.1531         | 6.1318 *     |
| X7 <- Climatic factor              | 0.8763      | 0.157              | 0.157          | 5.8669 *     |
| X8 <- Climatic factor              | 0.9221      | 0.1509             | 0.1509         | 6.4738 *     |
| X9 <- Climatic factor              | 0.8749      | 0.2048             | 0.2048         | 4.6056 *     |
| X10 <- Climatic factor             | 0.8937      | 0.1526             | 0.1526         | 6.1708 *     |
| X11 <- Climatic factor             | 0.8385      | 0.1655             | 0.1655         | 5.3061 *     |
| X12 <- Rainy day factor            | 1           | -                  | -              | -            |
| X15 <- Air quality                 | 1           | -                  | -              | -            |
| X16 <- Economic level              | 0.9428      | 0.0065             | 0.0065         | 144.9075 *   |
| X17 <- Economic level              | 0.8975      | 0.0189             | 0.0189         | 47.7 *       |
| X18 <- Economic level              | 0.9305      | 0.0092             | 0.0092         | 100.8193 *   |
| X19 <- Economic level              | 0.9092      | 0.0126             | 0.0126         | 72.3518 *    |
| X20 <- Economic level              | 0.866       | 0.0305             | 0.0305         | 28.3325 *    |
| X22 <- Economic level              | 0.7098      | 0.0368             | 0.0368         | 18.9368 *    |
| X23 <- Primary industry employment | 0.9185      | 0.0172             | 0.0172         | 53.4403 *    |
| X36 <- Primary industry employment | 0.9254      | 0.0143             | 0.0143         | 64.9397 *    |
| X26 <- Unemployment level          | 1           | -                  | -              | -            |
| X27 <- Education burden            | 0.8704      | 0.0301             | 0.0301         | 28.8949 *    |
| X28 <- Education burden            | 0.9002      | 0.0363             | 0.0363         | 24.835 *     |
| X30 <- Population density          | 1           | -                  | -              | -            |
| X34 <- Health service              | 0.9651      | 0.0358             | 0.0358         | 26.9949 *    |
| X35 <- Health service              | 0.9722      | 0.0318             | 0.0318         | 30.5485 *    |

\*  $p < 0.001$ .

**Table S2.** Bootstrapping tests of outer weights of observed variables from the PLS-PM.

| Observed Variable                  | Sample Mean | Standard Deviation | Standard Error | T Statistics |
|------------------------------------|-------------|--------------------|----------------|--------------|
| X1 <- Altitude factor              | -0.4819     | 0.0279             | 0.0279         | 17.3917 ***  |
| X5 <- Altitude factor              | 0.5307      | 0.0263             | 0.0263         | 20.0668 ***  |
| X2 <- Longitude factor             | 1.0000      | -                  | -              | -            |
| X4 <- Climatic factor              | 0.1471      | 0.1901             | 0.1901         | 0.8548       |
| X7 <- Climatic factor              | 0.1205      | 0.1106             | 0.1106         | 1.0302       |
| X8 <- Climatic factor              | 0.1967      | 0.0768             | 0.0768         | 2.7435 **    |
| X9 <- Climatic factor              | 0.3390      | 0.4316             | 0.4316         | 0.9409       |
| X10 <- Climatic factor             | 0.1484      | 0.0764             | 0.0764         | 1.9656 *     |
| X11 <- Climatic factor             | 0.0380      | 0.2705             | 0.2705         | 0.0566       |
| X12 <- Rainy day factor            | 1.0000      | -                  | -              | -            |
| X15 <- Air quality                 | 1.0000      | -                  | -              | -            |
| X16 <- Economic level              | 0.2413      | 0.0142             | 0.0142         | 17.1478 ***  |
| X17 <- Economic level              | 0.1850      | 0.0153             | 0.0153         | 12.2181 ***  |
| X18 <- Economic level              | 0.2127      | 0.0165             | 0.0165         | 12.9425 ***  |
| X19 <- Economic level              | 0.1489      | 0.0181             | 0.0181         | 8.2803 ***   |
| X20 <- Economic level              | 0.1776      | 0.0190             | 0.0190         | 9.3876 ***   |
| X22 <- Economic level              | 0.1670      | 0.0236             | 0.0236         | 6.8784 ***   |
| X23 <- Primary industry employment | 0.5324      | 0.0347             | 0.0347         | 15.2770 ***  |
| X36 <- Primary industry employment | 0.5511      | 0.0360             | 0.0360         | 15.3755 ***  |
| X26 <- Unemployment level          | 1.0000      | 0.0000             | 0.0000         | 0.0000       |
| X27 <- Education burden            | 0.5268      | 0.0609             | 0.0609         | 8.6324 ***   |
| X28 <- Education burden            | 0.5999      | 0.0574             | 0.0574         | 10.4487 ***  |
| X30 <- Population density          | 1.0000      | -                  | -              | -            |
| X34 <- Health service              | 0.4834      | 0.0989             | 0.0989         | 4.9875 ***   |
| X35 <- Health service              | 0.5449      | 0.0914             | 0.0914         | 5.8780 ***   |

\*\*\*  $p < 0.001$ , \*\*  $p < 0.01$ , \*  $p < 0.05$ .

© 2015 by the authors; licensee MDPI, Basel, Switzerland. This article is an open access article distributed under the terms and conditions of the Creative Commons Attribution license (<http://creativecommons.org/licenses/by/4.0/>).
